# Supplementary material
Source: PubMed Central journal article supplement (PMC9164213)

Supplementary Figure 1 | Uncropped gel images from gel experiments in main text Fig 1b

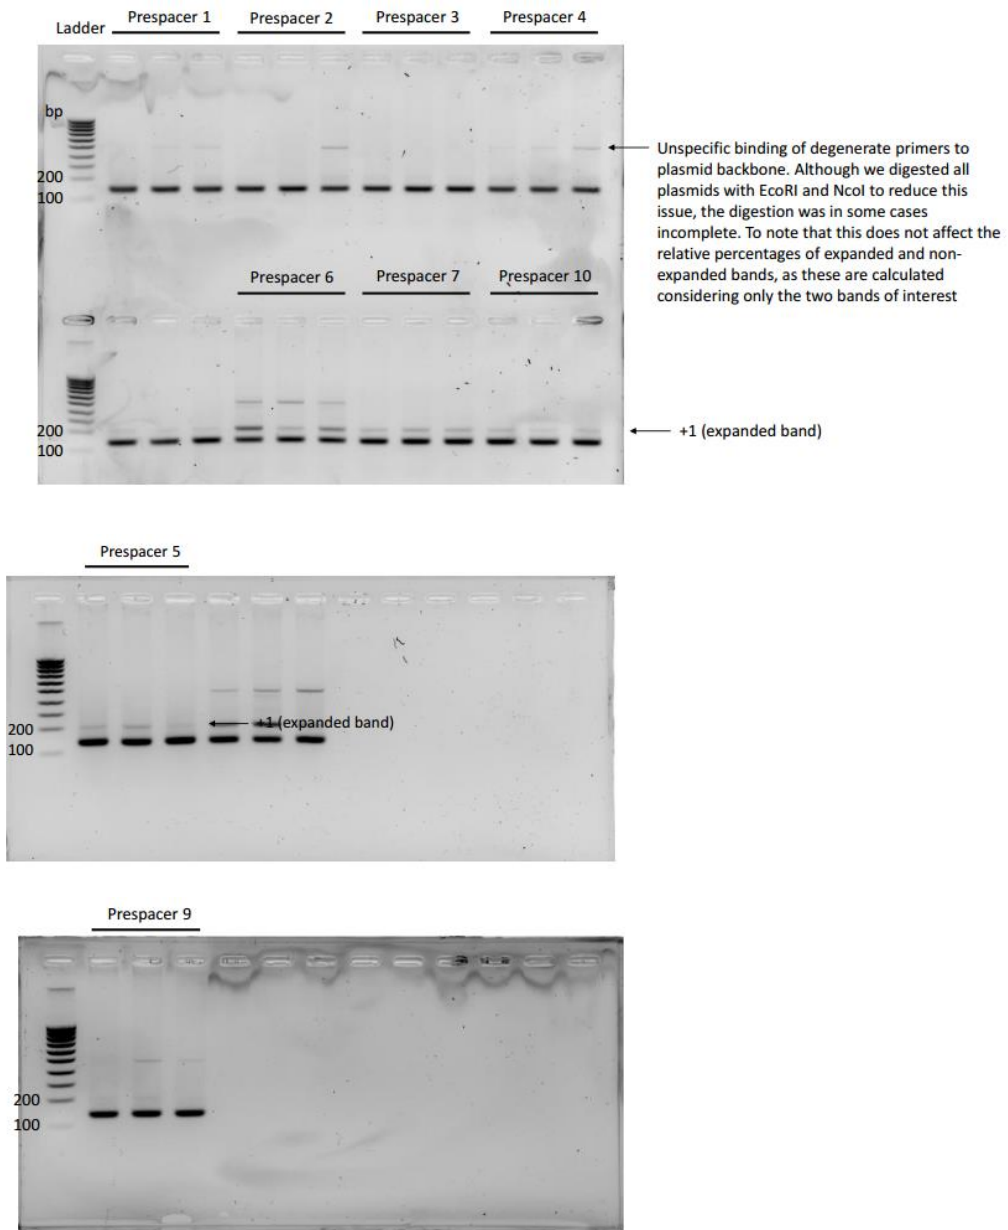

Fig 1b and Extended Fig 2g

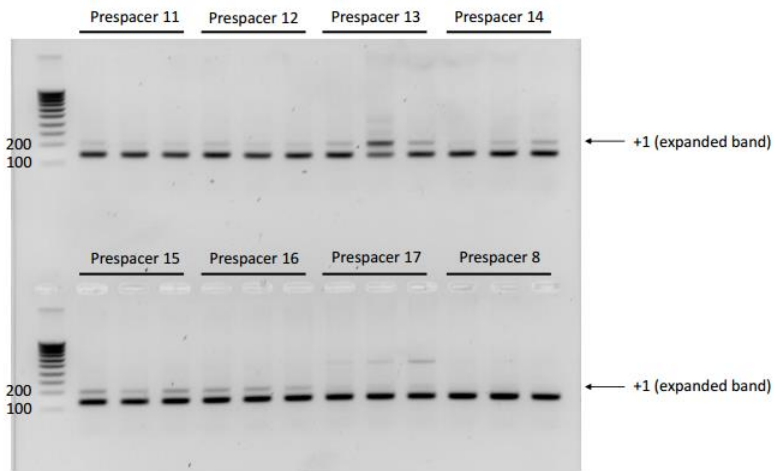

Fig 3b Cy3

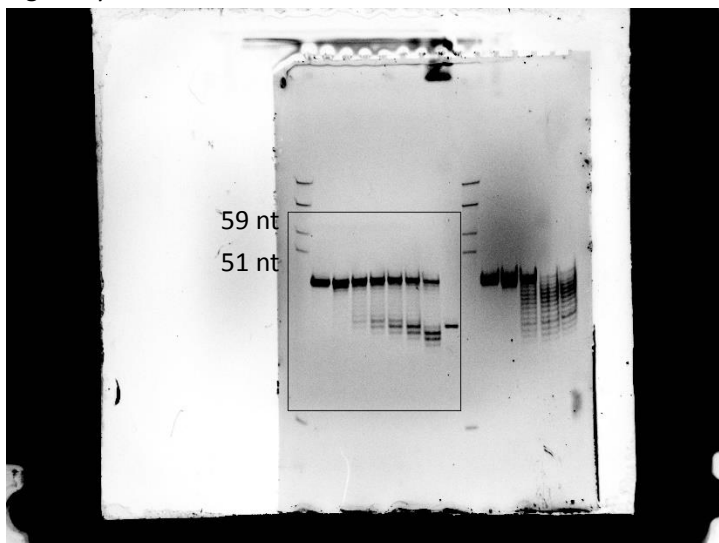

Cy3:Non-PAM side cleavage

Fig 3b Cy5

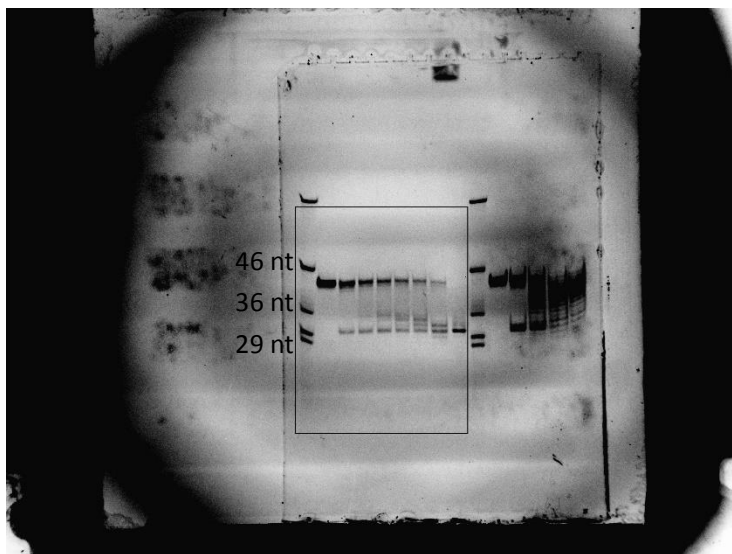

Cy5:PAM side cleavage

Fig 3b Merge

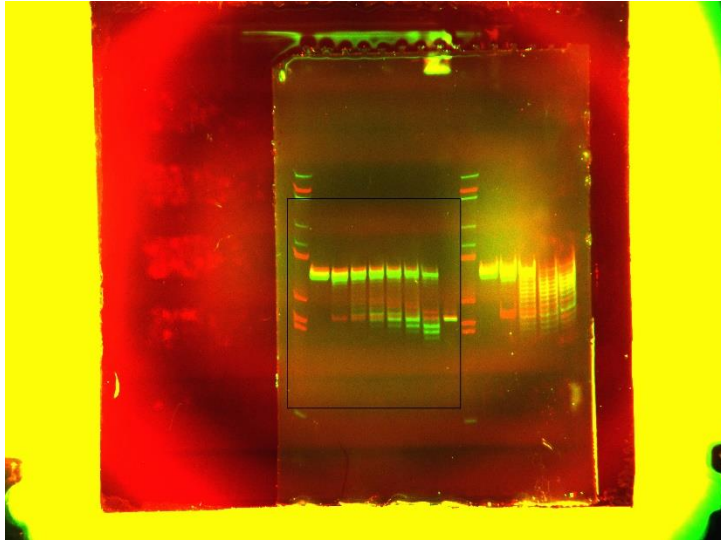

Fig 3d Cy3

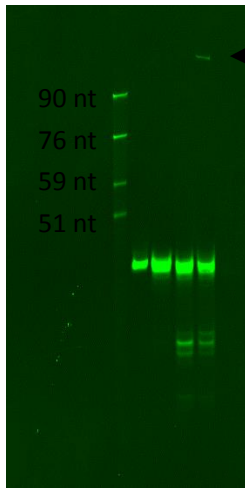

Integration band of non PAM side (L-R side integration)

Fig 3d Cy5

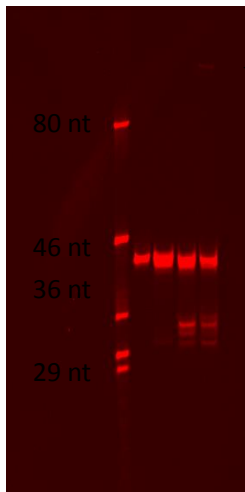

Integration band of PAM side (R-S side integration)

Fig 3d Merge

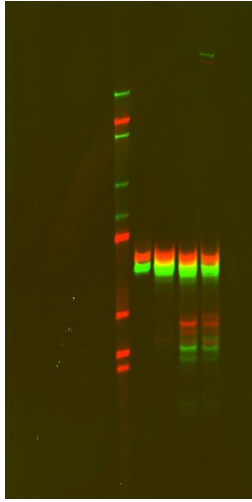

Fig 3f

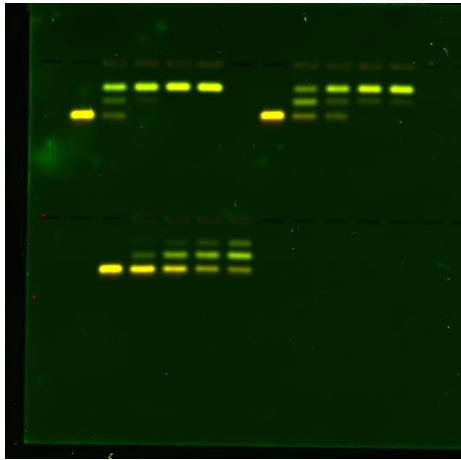

Fig 4a Cy3

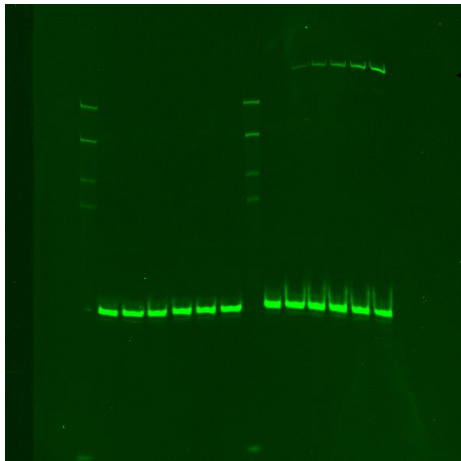

Fig 4a Cy5

← Integration band of already processed non PAM side (L-R side integration)

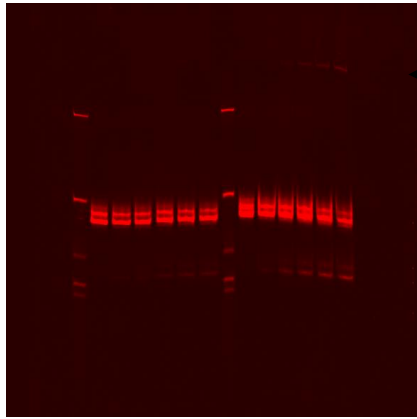

Integration band of already PAM side  
(R-S side integration)

Fig 4a Merge

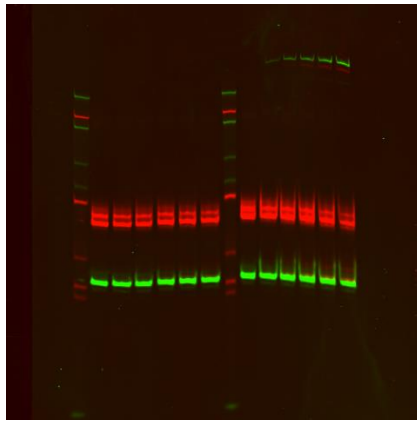

Supplementary Figure 2 | Uncropped gel images from gel experiments in Extended Data  
Extended Data Fig 1b

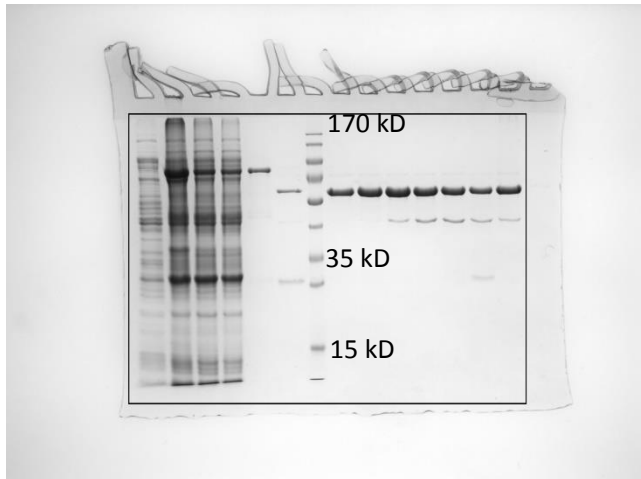

Extended Data Fig 1e

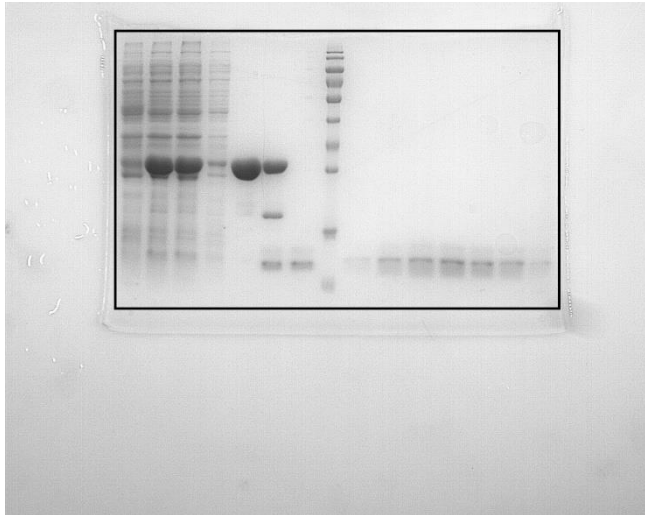

Extended Data Fig 1g

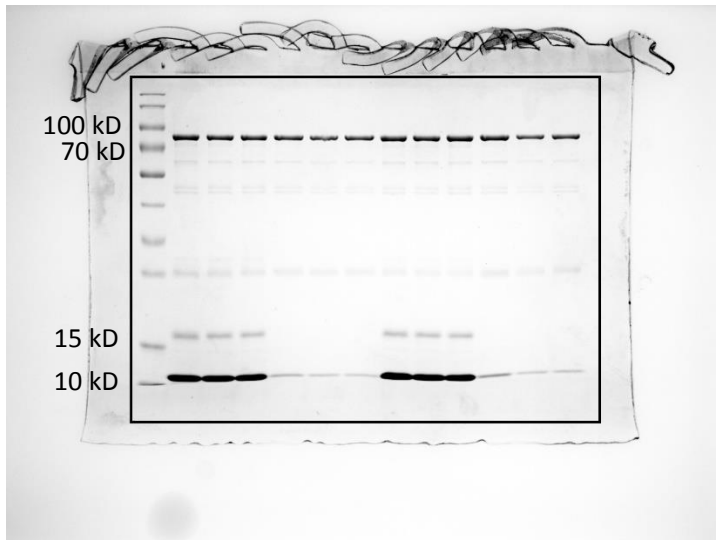

Extended Fig 1h Cy3

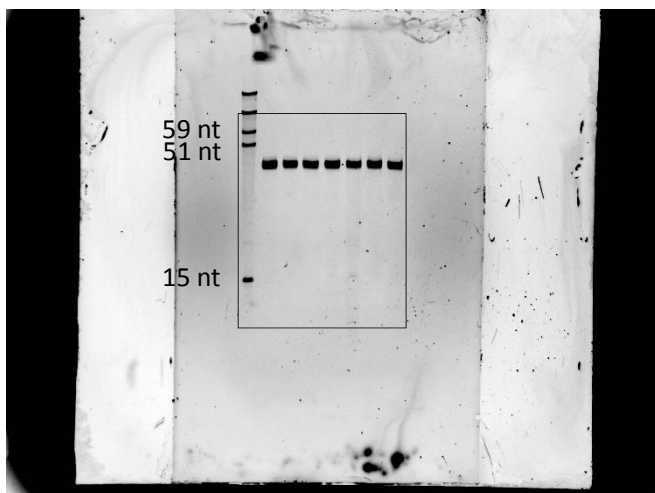

Extended Fig 1h Cy5

Cy3: Non PAM side, no any processing in any condition.

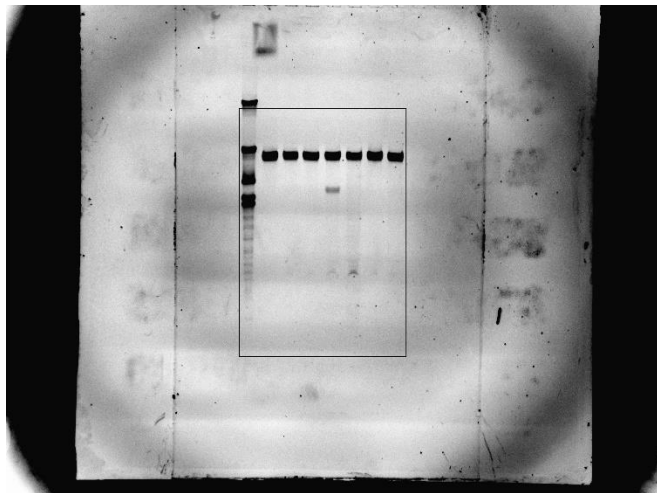

Cy5: PAM side, only process in Mn<sup>2+</sup> condition.

Extended Fig 1h Merge

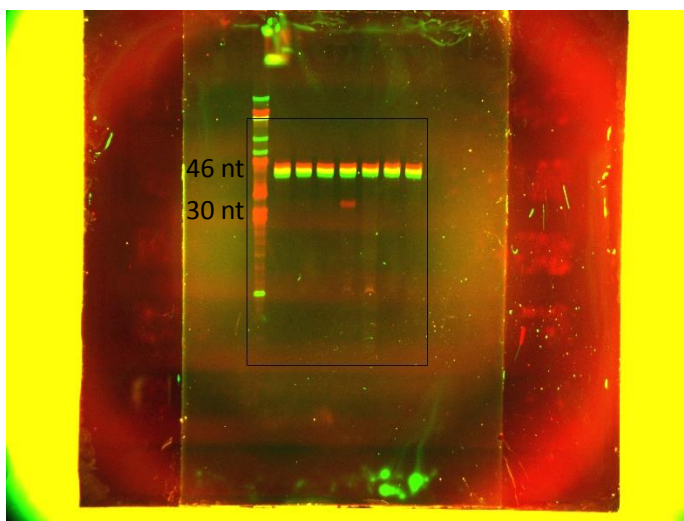

Extended Fig 1i Cy3

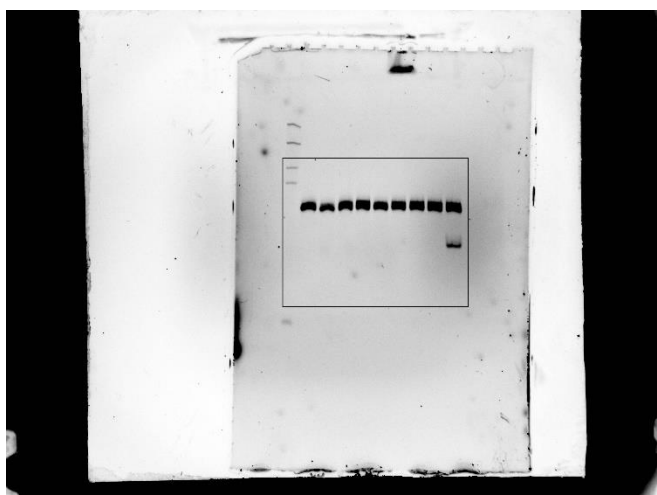

Extended Fig 1i Cy5

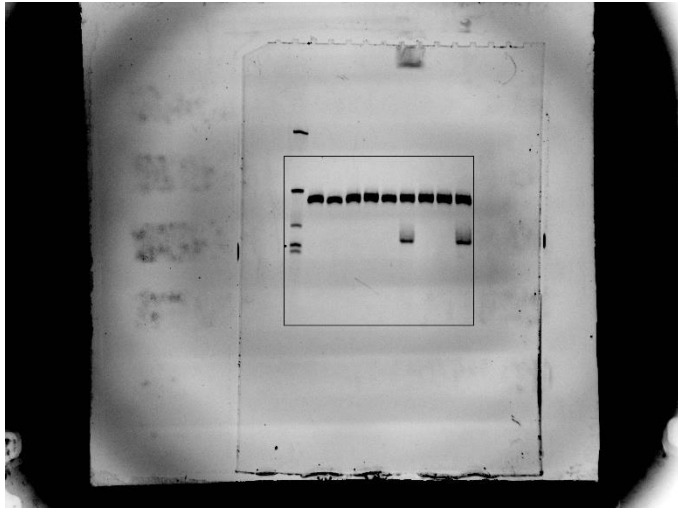

Extended Fig 1i merge

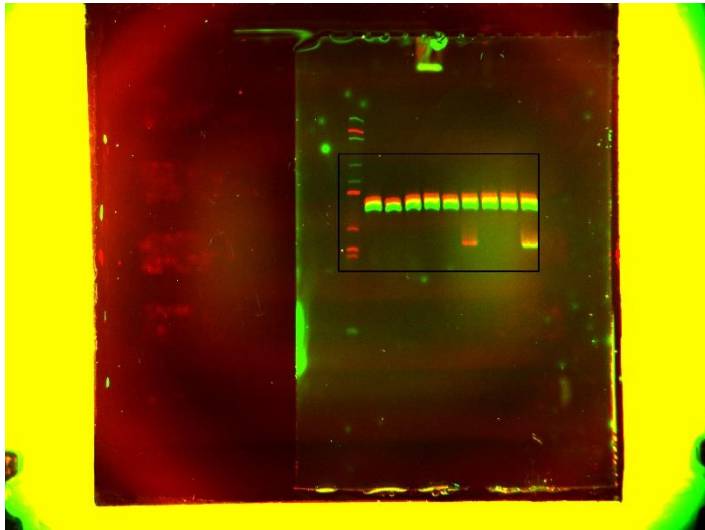

Extended Fig 1k Cy3

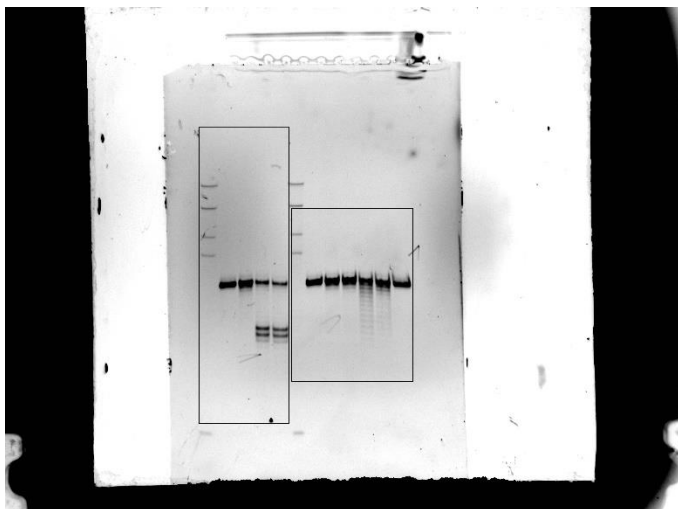

Extended Fig 1k Cy5



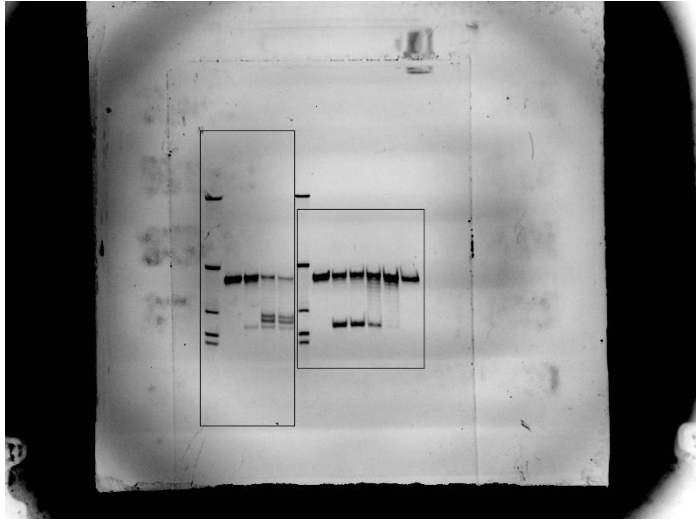

Extended Fig 1k Merge

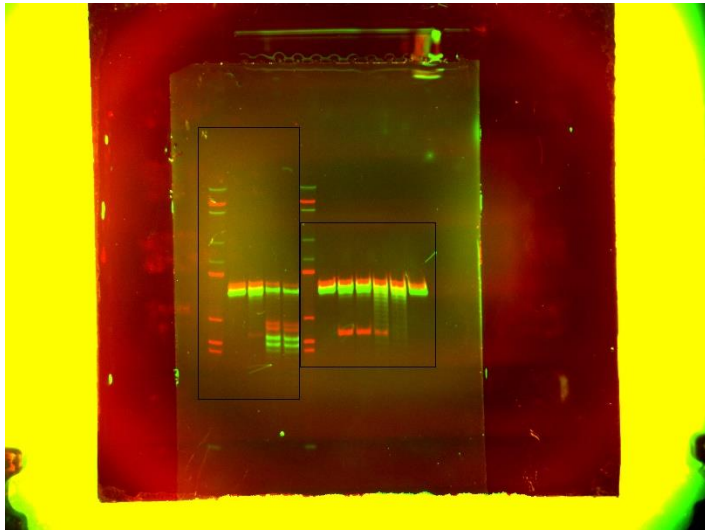

Extended Fig 2e Cy3

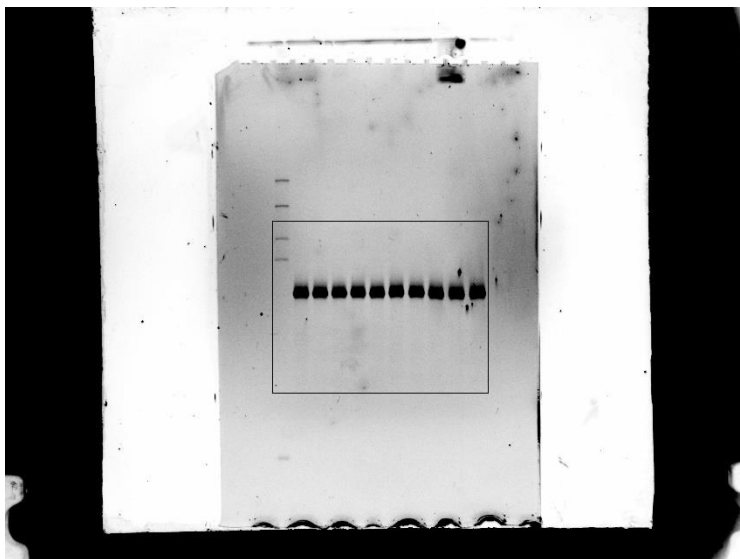

Extended Fig 2e Cy5

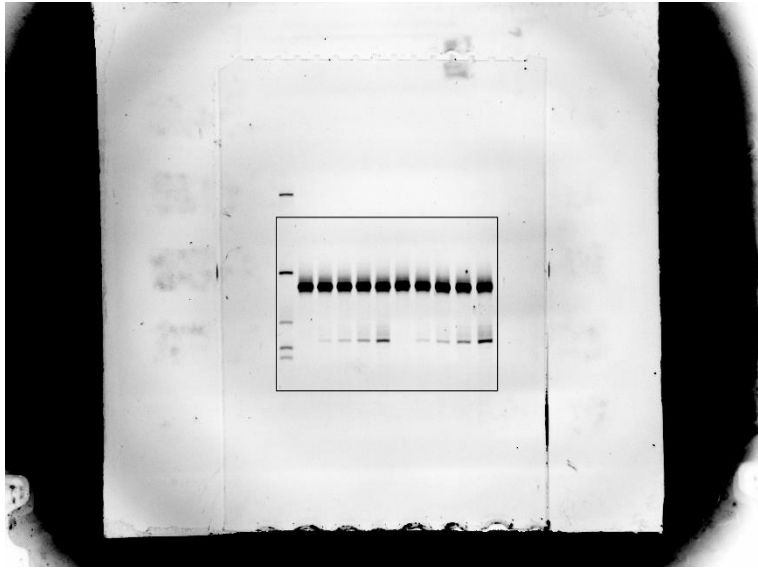

Extended Fig 2e merge

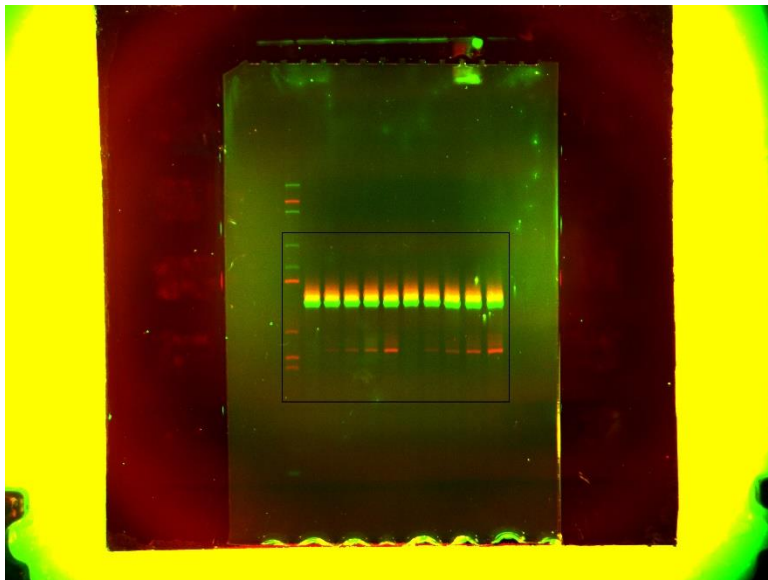

Extended Fig 4b

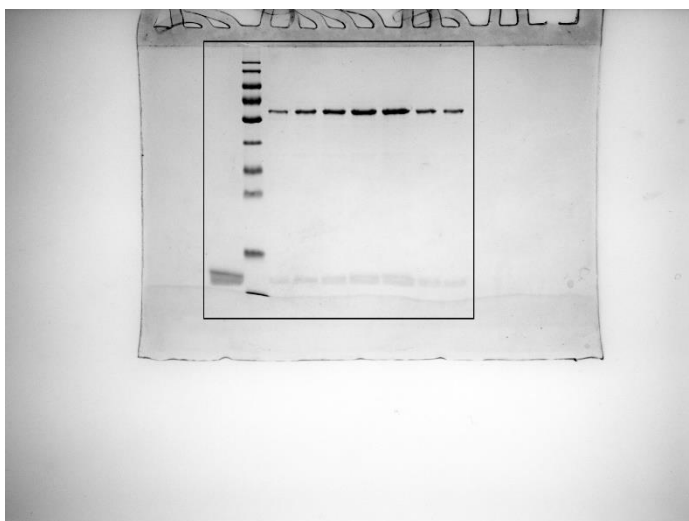

Extended Fig 4d

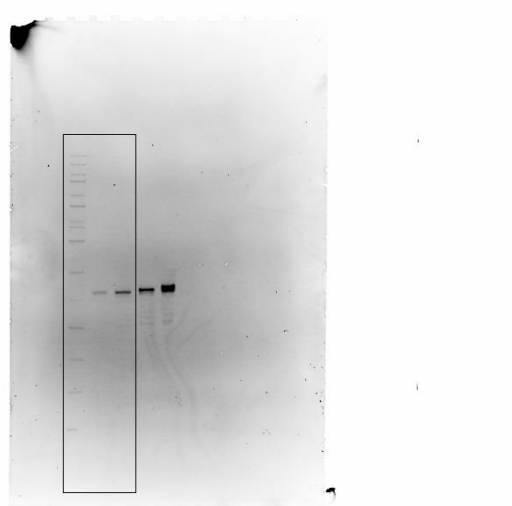

Extended Fig 4f Cy3

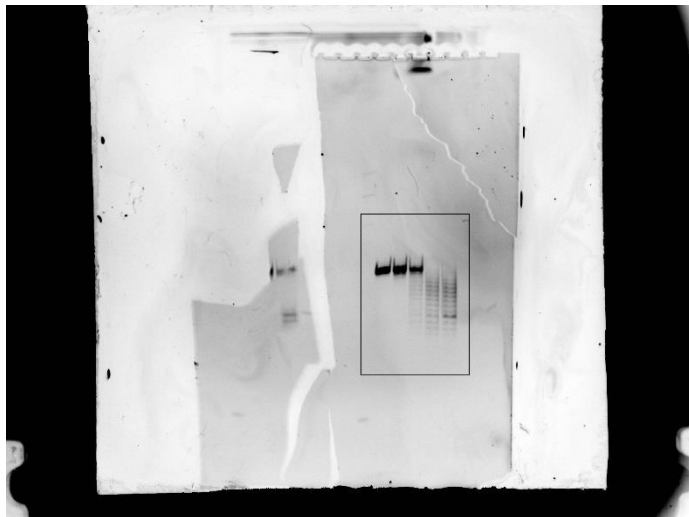

Extended Fig 4f Cy5

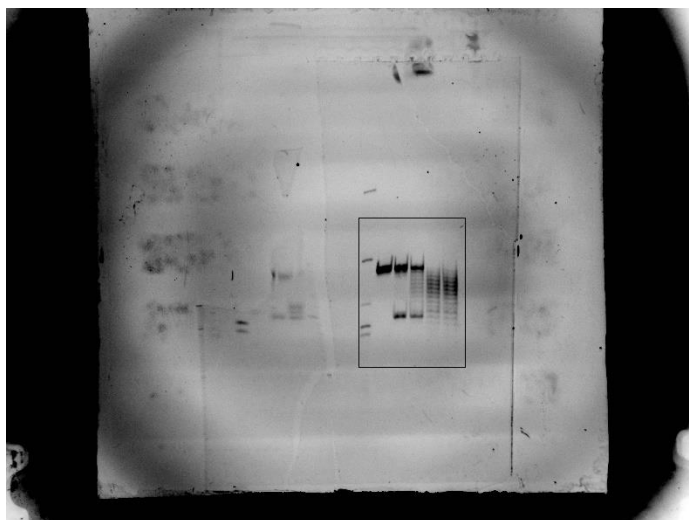

Extended Fig 4f merge

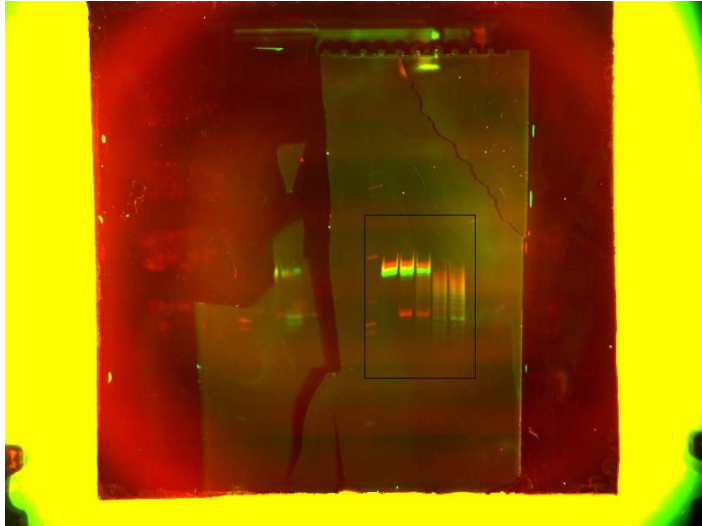

Extended Fig 4g double mutation

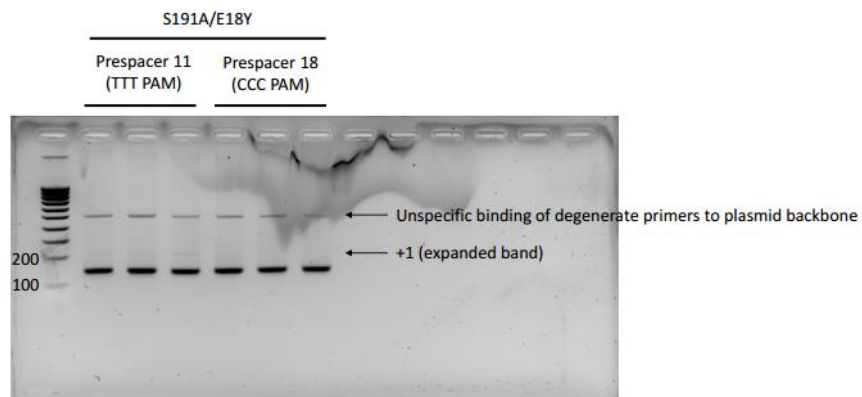

Extended Fig 4g single mutation

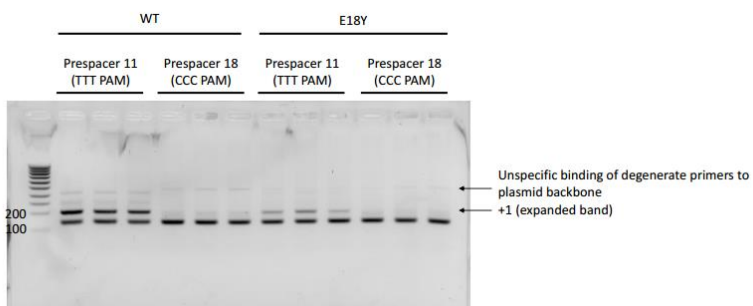

Extended Fig 7c Cy5

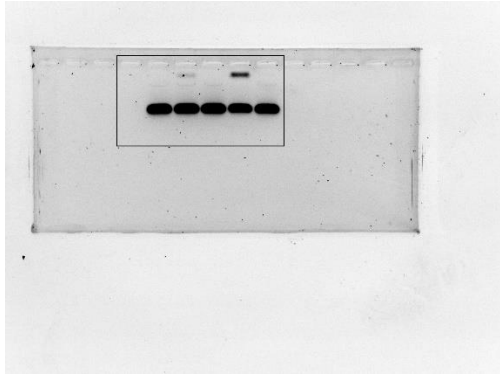

Extended Fig 7c EtBr staining

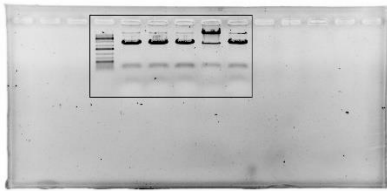

Extended Fig 7c merge

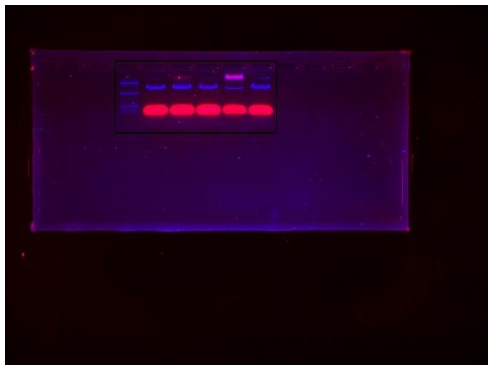

Extended Fig 7f Cy3

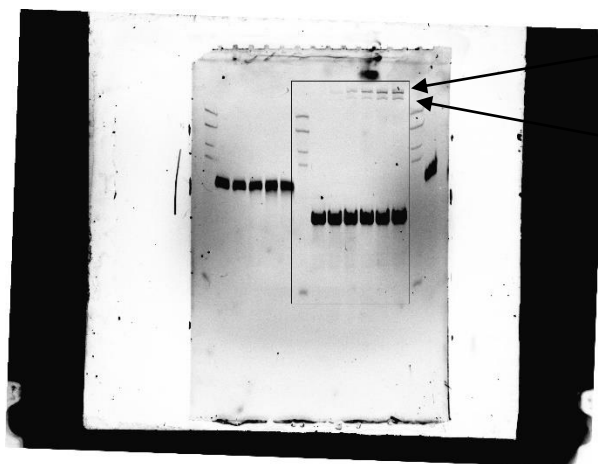

Upper band: integrated band of L-R side

bottom band: integrated band of R-S side

Extended Fig 7f Cy5

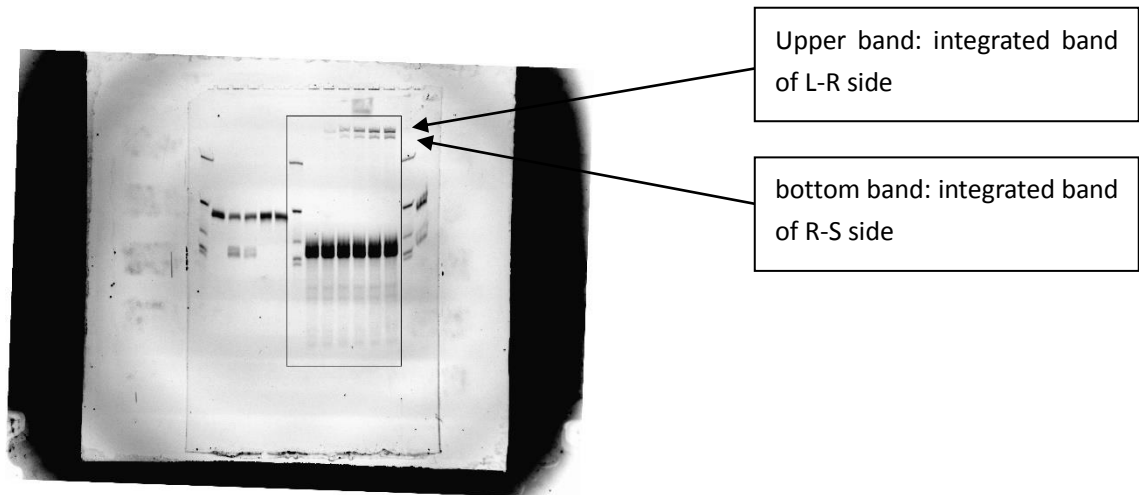

Extended Fig 7f Merge

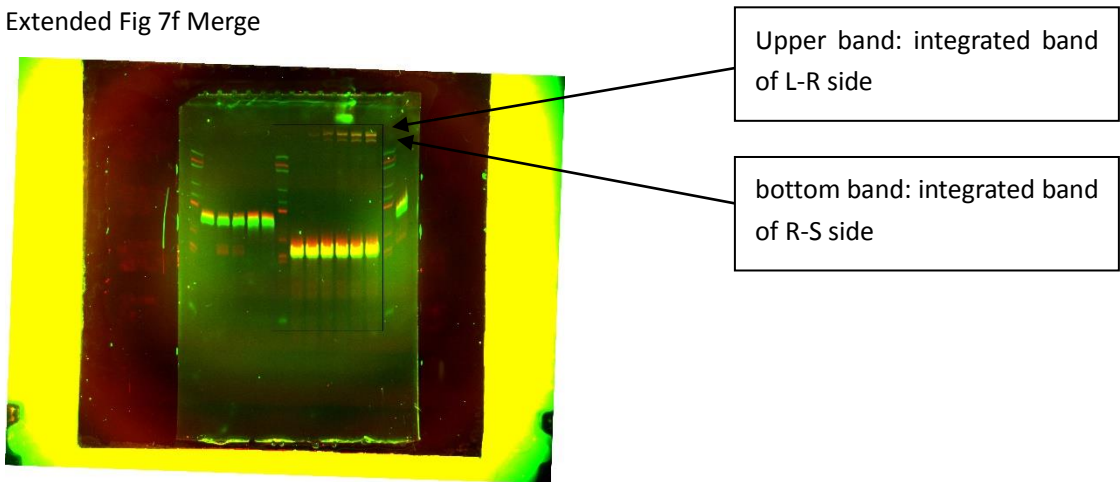

Extended Fig 7g Cy3

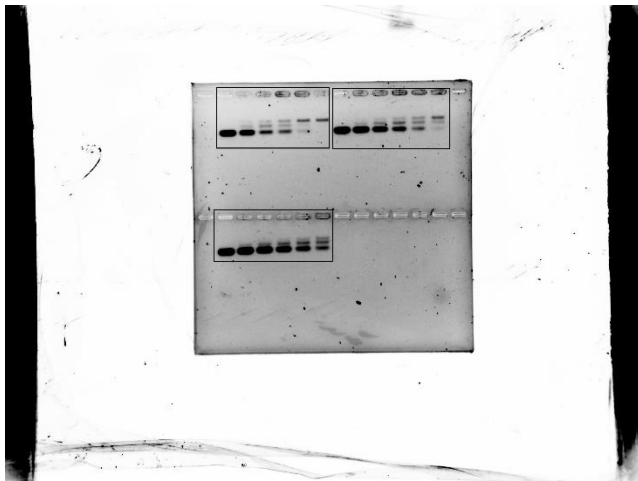

Extended Fig 7g Cy5

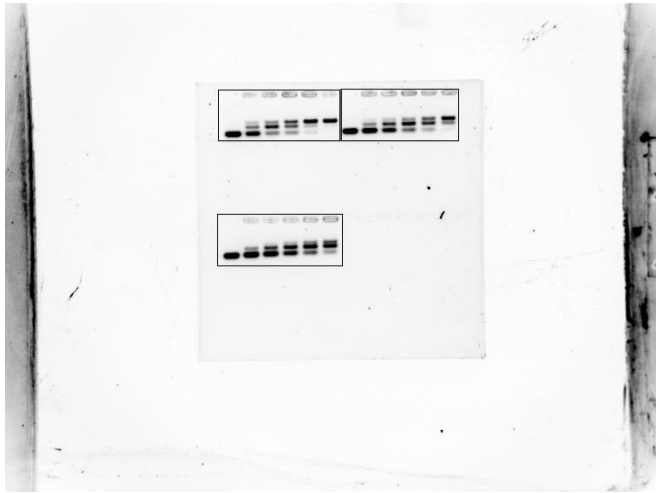

Extended Fig 7g Merge

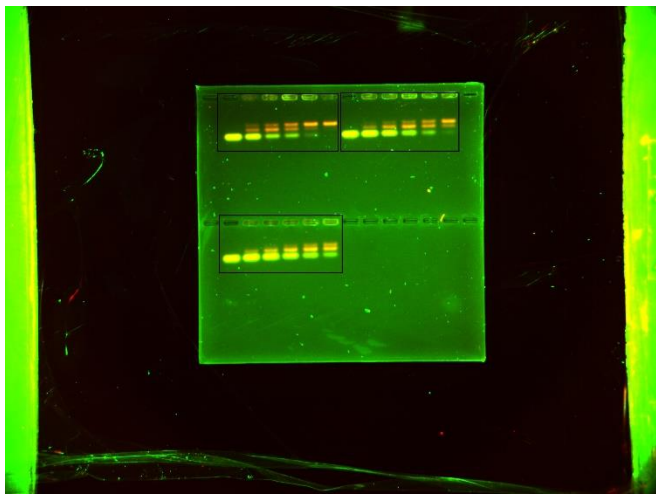

Extended Fig 8a Cy3

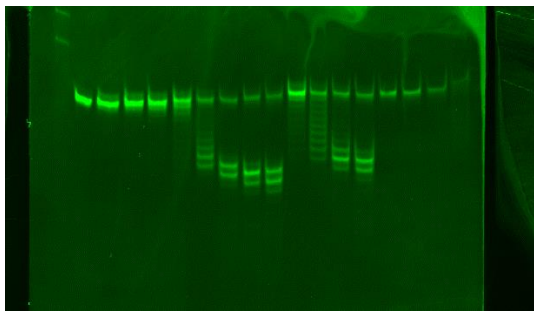

Extended Fig 8a Cy5

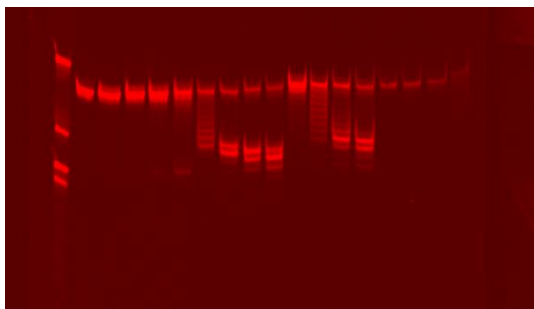

Extended Fig 8a Merge

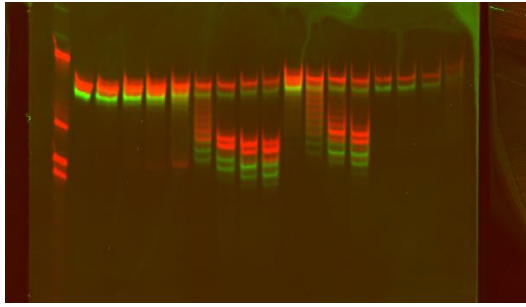

Extended Fig 8b Cy3

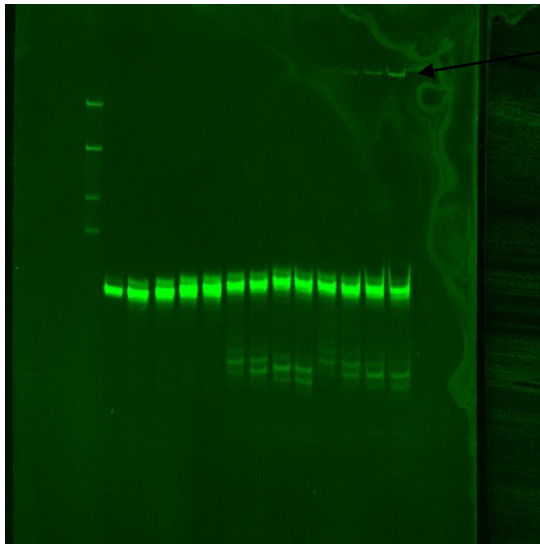

band of non-PAM side integrated into L-R side

Extended Fig 8b Cy5

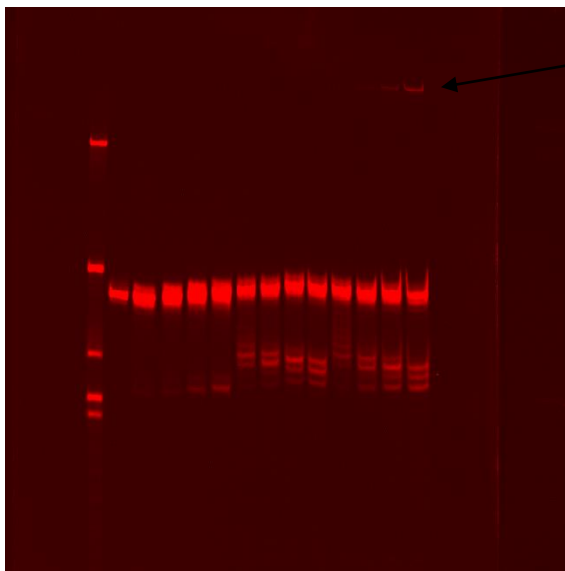

band of PAM side integrated into R-S side

Extended Fig 8b Merge



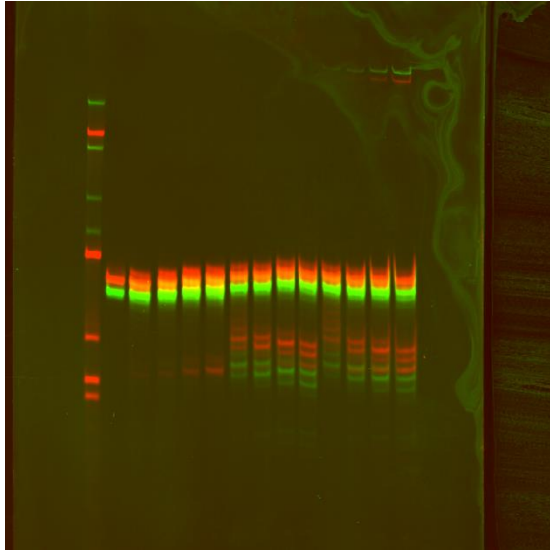

Extended Fig 8c Cy3

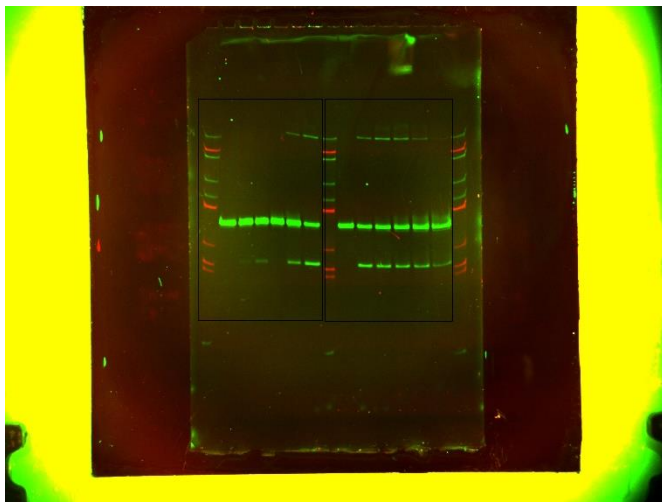

Extended Fig 8d Cy3

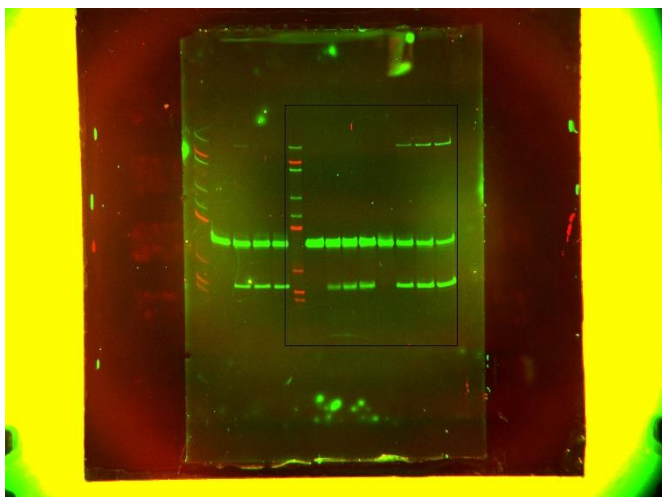

Extended Fig 8d

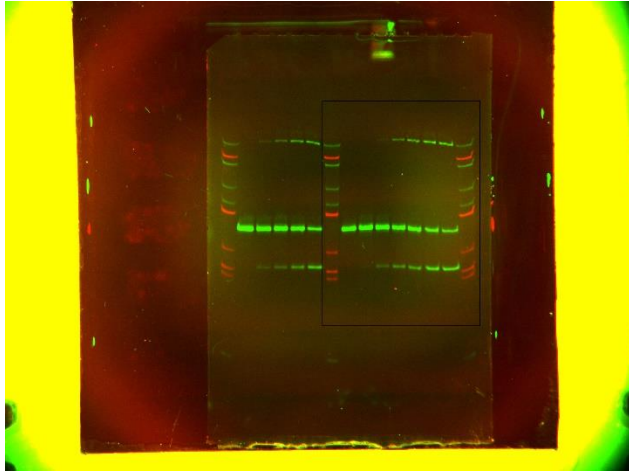

Extended Fig 8f

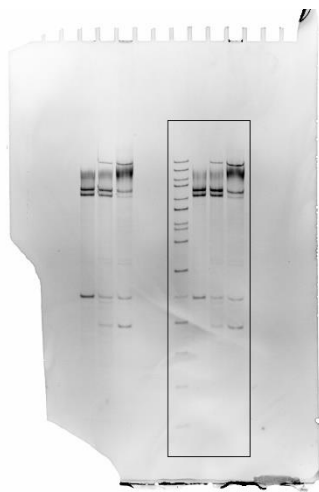

Extended Fig 8h (unflipped)

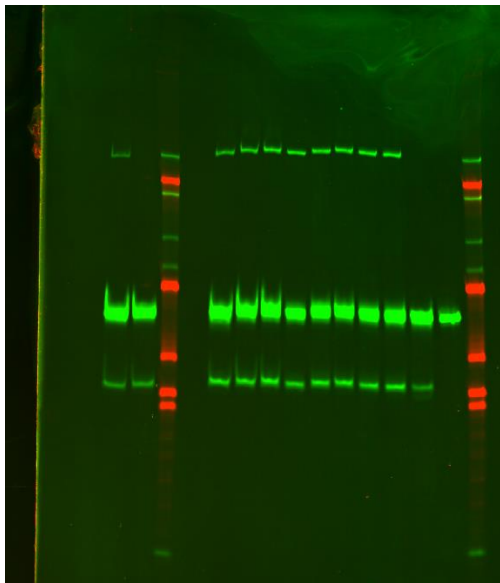

Extended Fig 8i merge

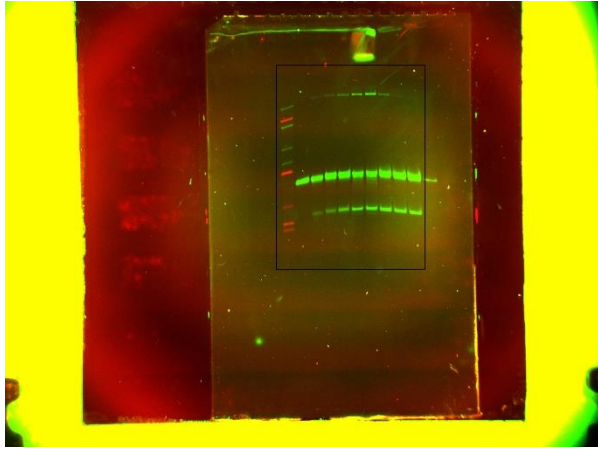

Extended Fig 8j Cy3

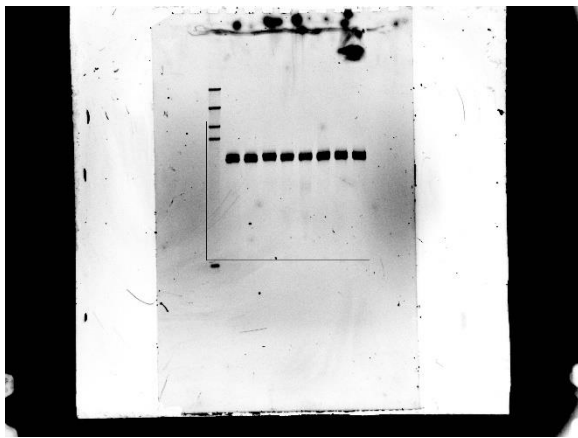

Extended Fig 8j Cy5

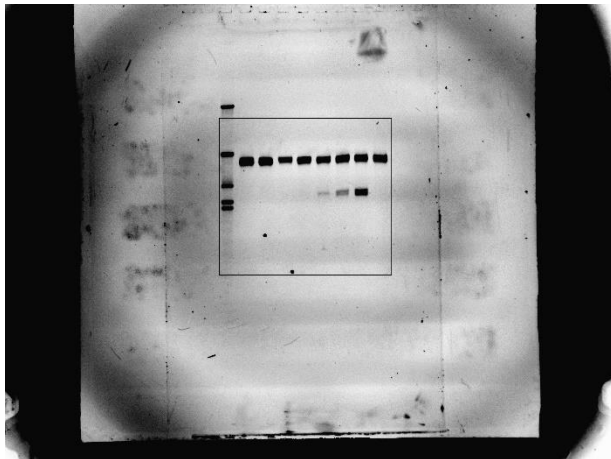

Extended Fig 8j Merge

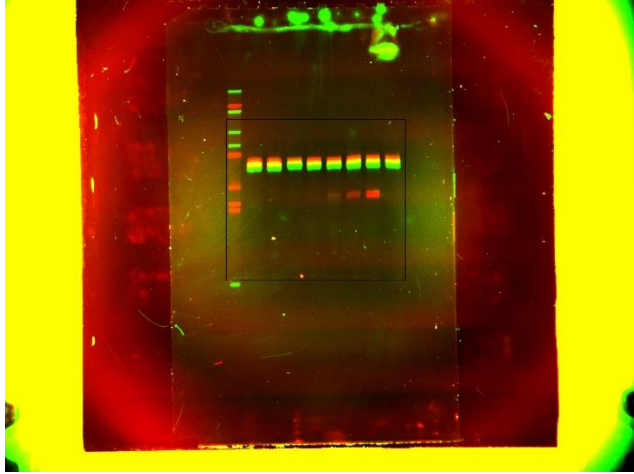

Extended Fig 8k

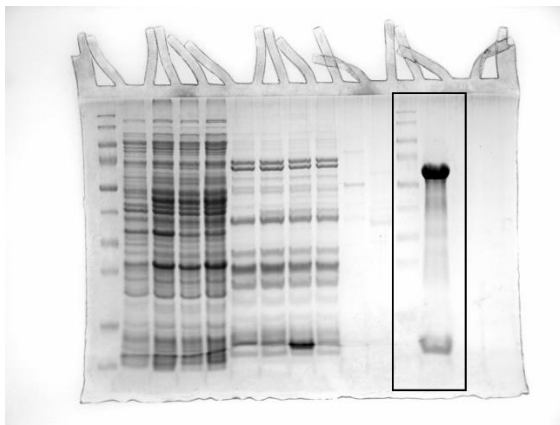

Supplement: NIHMS1808996-supplement-1808996_SI_Fig_1.pdf [file NIHMS1808996-supplement-1808996_SI_Fig_1.pdf]
